# Supplementary material for: Enhanced levels of double-strand DNA break repair proteins protect ovarian cancer cells against genotoxic stress-induced apoptosis
Source: PubMed Central journal article supplement (PMC3848582; doi:10.1186/1757-2215-6-66), 2013-09-17
Supplement: 1757-2215-6-66-S2.pdf [file 1757-2215-6-66-S2.pdf]

**Additional file.2:** Functional annotation based categorized of 34 LEx proteins to 14 cellular processes in transformed SeOvCa cells.

| <b>S.No.</b> | <b>Functional group/Cellular process</b>   | <b>Categorized proteins</b>     |
|--------------|--------------------------------------------|---------------------------------|
| 1            | Chemoresistance                            | HSPD1, PRDX2, PDIA3, SOD1       |
| 2            | Resistance to Apoptosis                    | PRDX2, PDIA3, SOD1, NPM1        |
| 3            | Oxidative stress                           | SOD1, NPM1, PRDX2, RNASEL, ENO2 |
| 4            | Transcriptional regulation and Maintenance | MAGOH, XRCC5, RAD50, CBX5, NPM1 |
| 5            | Invasion and Proliferation                 | NPM1, PRDX2                     |
| 6            | Transport and Signaling                    | CLIC4, SSR4, KPNA4              |
| 7            | RNA Metabolism                             | SNRPF, NPM1                     |
| 8            | DSB Repair                                 | NPM1, RAD50, XRCC5              |
| 9            | Protein Synthesis                          | EEF1A1, TUFM                    |
| 10           | Protein Degradation                        | PSMA1, PSMB3, PSMC2, PSMC4      |
| 11           | Protein Folding and Isomerization          | HSPD1, PDIA3, CCT3, CCT8, FKBP4 |
| 12           | Energy Production and Metabolism           | ATP5B, ATP5D, ENO2, ECH1, PKM2  |
| 13           | Immunological Responses                    | B2M, SCRIN                      |
| 14           | Structural and secretory proteins          | MYO1D, ALB                      |
